# Supplementary material for: The role of microRNAs in the development, regulation, and treatment of atrial fibrillation
Source: Springer Nature journal article supplement (doi:10.1007/s10840-018-0495-z), 2019-01-03
Supplement: MOESM1 [file 16373206]

**Supplemental Table 1. MiRNA Assays**

| MiRNA | TaqMan Assay Name | TaqMan Assay ID | | MiRBASE ID |
| --- | --- | --- | --- | --- |
| miRNA -21 | hsa-miR-21 | | 000397 | hsa-miR-21-5p |
| miRNA -29a | hsa-miR-29a | | 002112 | hsa-miR-29a-3p |
| miRNA -133a | hsa-miR-133a | | 002246 | hsa-miR-133a-3p |
| miRNA -133b | hsa-miR-133b | | 002247 | hsa-miR-133b |
| miRNA -150 | hsa-miR-150 | | 000473 | hsa-miR-150-5p |
| miRNA -328 | hsa-miR-328 | | 000543 | hsa-miR-328-3p |
| miRNA -16 | hsa-miR-16 | | 000391 | hsa-miR-16-5p |
